# Supplementary material for: Understanding cryogenic frost point hygrometer measurements after contamination by mixed-phase clouds
Source: Copernicus journal article supplement (doi:10.5194/amt-2020-176), 2020-05-29
Supplement: Supplementary file [file amt-2020-176-AC1-supplement.pdf]

# Anonymous Referee #2

Below are the comments from the referee in black and replies from the authors in blue.

## General comments

This manuscript, with 34 figures and 3 appendices, is quite lengthy and, at times, highly technical, making it a very large meal to digest. In general, the paper is well-conceived and it should be of interest to AMT readers.

I am not convinced that the appendices A and B add anything extraordinarily different from the main body of the paper. They do serve to greatly increase the paper's length by 4 text pages plus 17 figures (on top of the main body's 16 figures). I have never reviewed a standard (non-review) journal article with more than 20 figures, but here I will let the authors and editor decide about the necessary length for this paper.

We agree with the referee that the two appendices contribute massively to the length of the manuscript. However, given there are only a very limited number of measurements offering themselves for such an analysis, the science of balloon-borne measurements gains by each additional case. The StratoClim dataset has only three cases showing this contamination phenomenon with the right combination of instruments. Therefore, we think that investigating and publishing the three cases provides significant additional support for the hypothesis developed in the manuscript. Given this dilemma we converted Appendices A and B into Supplementary Online Material (even though this does not fully satisfy the AMT rules on appendices and supplements). This will shorten the manuscript significantly.

I find that section 2.4, although interesting, is not really needed in this manuscript because the conclusions of this paper are not at all dependent on the modelling of mixed-phase clouds. Frost point hygrometer profiles showing the observed degree of contamination are undoubtedly afflicted by ice attached to the inside of the intake tube. This section could easily be removed to reduce the manuscript's length.

We admit this section was possibly not sufficiently motivated in the paper. The existence of liquid droplets in water sub-saturated clouds at these temperatures is unusual. Therefore, the micro-physical modelling of these clouds is an important prerequisite for the entire analysis, suggesting that the clouds are formed by many small and a few big droplets. The big water droplets can survive at the observed water subsaturation, after the small ones evaporate.

Furthermore, the mixed-phase cloud modelling increases the relevance of the manuscript. As mentioned in the conclusion section, "it was known that liquid clouds and warm mixed-phase clouds could irreversibly contaminate water vapour measurements by the CFH [Holger Vömel, personal communication, 2016], but our results show that even cold mixed-phase clouds with very low LWC can affect the measurement of water vapour by the CFH". It could be argued this is not a scientific breakthrough, but it complements our previous knowledge.

We improved the manuscript on page 7 lines 8 to 12: ‘The existence of liquid droplets in water sub-saturated clouds at these temperatures ( $T_{\text{air}} = -20\text{ }^{\circ}\text{C}$ ) is unusual. However, the passage through an ice cloud would not cause the observed contamination. The ice crystals likely bounce off the surfaces of the balloon, payload and intake tube. The presence of supercooled liquid droplets is necessary to form the ice layer inside the intake tube. Only supercooled liquid droplets freeze upon contact with a surface and lead to an icy surface coating of the balloon, payload and intake tube.’

In all honesty, I was hoping that the very technical fluid dynamics modelling presented in great detail in this paper was going to result in a way to remove the effects of contamination from the measured profiles. I am guessing that the assumptions involved with such a procedure would cause the resulting corrected profiles to have very large uncertainties.

Of course it would have been nice if our analysis could have been used to develop a “data correction recipe”. However, there are a lot of uncertainties and assumptions involved in this study, especially concerning the properties of the tropospheric mixed-phase cloud, which make a systematic correction of the contaminated data impossible

There are many grammar, clarity and language issues that I will try to help fix with the suggested changes below.

We thank the referee for carefully reading the manuscript and all the suggestions.

## **Specific comments:**

Page 1 Line 1 (P1 L1): why do measurements only in the “(sub)tropical” UTLS provide “important information on air chemistry and climate”? Don’t similar measurements in the mid-latitudes (where this contamination can also occur) also provide important information?

We agree with the referee. The word (sub)tropical has been moved to line 4 to characterize the measurements used in this manuscript.

P1 L3: are the measurements rendered “difficult” or “unusable” by the contamination?

Yes, unusable. We replaced the word. However, this study identifies the cause of this contamination and suggest technical improvements. As discussed in the final section of the paper, the implementation of a heating cycle of the intake tubes will increase the technical effort, but might eventually make this type of contamination obsolete.

P1 L8: isn’t the  $60^{\circ}$  maximum impingement angle somewhat determined by the length of the tether used to suspend the instrument below the balloon?

The length of the tether (55 m in our case) plays an important role determining the maximum impingement (in the new revised version of the manuscript ‘impact’) angle. The most significant contribution of the tether’s length towards the impact angle is through the radius of the circular

movement that such tether allows. The 55 m-long tether allows the observed radius of the payload circular movements to be between  $r=10$  m and  $r=20$  m. If the tether was shorter or longer, we would observe a very different radius for the circular movement. However, it would have not been possible to calculate the impact angles by only considering the length of the tether. The treatment of the RS41 GPS data is essential to calculate the horizontal velocity induced by the circular movement and the angle of the intake tube relative to the ascent direction of the balloon.

P1 L11: add “and unrealistically” before “high”

Done (page 1 line 11).

P1 L14: add “during ascent” after “only”. This does not happen during descent.

Done (page 1 line 14).

P2 L2: The flight train outgassing contamination will affect all balloon-borne hygrometers, not just cryogenic FPs. Does hydrometeor contamination really affect hygrometers with a short or heated air intake?

We agree with the referee. Outgassing from the flight train affects all balloon-borne hygrometers (page 2, line 4). However, we think the hydrometer contamination also affects hygrometers with short and/or heated air intake, e.g. the SnowWhite has a short heated intake duct, and still suffered from unexplained contamination as was reported in Cirisan et al. (2014). Furthermore, when the intake of the hygrometer is heated, the instrument measures total water content (TWC), instead of water vapour.

In Section 5.4.2 of this manuscript, we show by means of CFD simulation that with a shorter intake tube the sampled air might also be contaminated by water vapour outgassing from the instrument’s box. If the instrument goes through a mixed phase cloud, the hydrometeors will also impact on the instruments box. From the measurement of an instrument with a shorter intake tube, it will be difficult to distinguish the source of the contamination: the hydrometeors which impacted inside the intake tube or the ones which impacted the box.

P2 L5: “severe” implies worse than elsewhere, but the absolute contamination may be worse at or below the tropopause than above it. I think you instead mean to say the “relative impact of contamination on the measurements is severe in the stratosphere”.

We agree with the referee. Done (page 2 line 5 to 6).

P2 L7: Does increasing the tether length or preferential use of descent data help reduce the hydrometeor contamination, or just the flight train contamination? This statement sounds like both contamination types are influenced.

We agree with the referee. The statement has been rephrased (page 2 line 7).

P2 L11: replace “ropes” with “thin hydrophobic tethers”

Done (page 2 line 11 to 12).

P2 L13: add “by radiosondes” after “temperature measurements”

Done (page 2 line 14).

P2 L15: I’m surprised the pioneering FP work by Brewer et al. (1948) is not mentioned here, although they used aircraft for their novel measurements, not balloons. I believe these were the first upper atmospheric water vapor measurements using FP hygrometry.

Brewer, A. W., Cwilong, B., and Dobson, G. M. B.: Measurement of Absolute Humidity in Extremely Dry Air, Proc. Phys. Soc., 60, 52–70, 1948.

We did not mean to exclude this pioneering work, but found that the paper focus more on balloon borne contamination. In this sense, these measurements from an aircraft platform do not fit the message of the paper. Therefore, we changed the title of the paper to: “Understanding balloon-borne frost point hygrometer measurements after contamination by mixed-phase clouds”.

P2 L22: Change to “Nearly all balloon-borne frost point hygrometer (FPH) soundings performed by NOAA’s Global Monitoring Laboratory (Hall et al., 2016) use this valve.”

Done (page 2 line 23 to 24).

P2 L24: change “of the instrument” to “by the instrument”

Done (page 2 line 25).

P2 L26: change to “using larger diameter stainless steel intake tubes that allow higher flow rates.” Also, insert “the instrument” between “enabled” and “to”

Done (page 2 line 27). Done (page 2 line 28).

P2 L29: “until today” makes it sound like their use has been discontinued. Please change to “These tubes are currently 2.5 cm”

Done (page 2 line 30). We added a more recent reference to the sentence (page 2 line 31).

P2 L30-32: change to “shielding the air flowing into the instrument from the contamination” and “containment” to “insulating container”, add “mirror” before “surface” and change “extruding” to “extending”

Done (page 2 line 32). Upon suggestion from the Anonymous Referee # 1 we replaced “containment” by “box” (page 2 line 33). Done (page 2 line 33). The term “extending” sounds as if the mirror starts at the wall and extends until 1.25 cm from the wall. The authors replaced “extruding” by “displaced” (page 2 line 33).

P3 L12: do you mean “preferential” or “susceptible”?

We want to convey that from all the surfaces of the CFH exposed to the environment, the intake tubes are the most likely surface to be subject to icing and to cause contamination of the measurement. In this sense, the word susceptible is a better fit. Done (page 3 line 12).

P3 L18: it is also a common feature of soundings in mid-latitude convective regions like the Asian and North American monsoons

The statement has been rephrased (page 3, line 15).

P4 L9: RH corrections for RS41 measurements are provided by the Vaisala MW41 software, not the sonde itself

Done (page 4 line 14).

P4 L11: “automated ground check” of what? A single point check? 0% RH or 100% RH?

Here, we mean the MW41 ground check before launching the RS41. The “automated ground check” checks the capacitive sensors RH = 0% by heating the sensor until all humidity has been blown off and it compares the pressure sensor measurement to a user inserted pressure value. For this campaign, we also did an 100% humidity chamber check, but this is not automatically accounted for by the MW41 software. The statement has been changed to “zero humidity automated ground check” in the manuscript (page 4 line 16).

P4 L13: “cold”, “cryogenic” and “refrigerant” all imply the same thing. How about “against continuous cooling of the mirror by a cryogenic liquid.”

Done (page 4, line 18).

P4 L13: change “air mass” to “air flowing past the mirror”

Done (page 4, line 19).

P4 L18: I presume these biases are for the Vaisala-corrected RS41 RH measurements. This should be stated here.

Brunamonti et al. (2019) uses Vaisala-corrected RS41 RH measurements. Done (page 14, line 25).

P4 L20: “could”? or “did”?

Discrepancies of 50% H<sub>2</sub>O mixing ratio between the CFH and the Vaisala-corrected RS41 RH measurements did occur. Discrepancies as high as 100% were also recorded. Done (page 4, line 26).

P4 L21: how is the 10 ppmv limit “empirical”? Isn’t this instead a “realistic threshold”?

The 10 ppmv threshold is realistic, however it is also empirical. There are two schools of stratospheric water vapour measurements. One school accepts that measurements can be discarded

if they seem unrealistic, the other tries to extensively explain by physical processes how could these measurements happen. The authors of this manuscript and of Brunamonti et al. (2019) clearly belong to the second school. So, we prefer to call it an empirical threshold. (page 4 line 27)

P4 L22,23: change “was” to “were” (data is plural noun). Here and throughout the paper.

Since the use of the word “data” is accepted in English as a singular and as a plural, we will wait for the editor’s and typewriter’s decision regarding this point.

P4 L27: “the operation” is vague. Instead, describe the poor sensitivity at low RH values in a cold environment.

Done (page 5, line 2).

P4 L28: “clearing and freezing cycles” will not be understood by many readers. Please briefly describe why this is done.

The following explanation was added to the manuscript: ‘The clearing and freezing cycle consists of a forced heating of the CFH mirror to blow-off any deposit, followed by a forced cooling of the mirror. During the cycle at approximately -15 °C, the mirror is forced cooled to temperatures below which ice certainly forms (-40 °C). During the second cycle at approximately -53 °C, the mirror is forced cooled to temperatures below which hexagonal ice forms (-82 °C). Hexagonal ice is more stable than cubic ice. The data collected during the freezing and clearing cycles is not used for further analysis, but we do not remove it from the water vapour profiles. This feature gives us confidence that after it the phase of the deposit in the mirror was ice or hexagonal ice.’ (page 5, line 4 to 9).

P4 L30: and not just “ice”, but “hexagonal ice” (rather than cubic ice)

Done (page 5, line 7 and 9).

P5 L5: How do the potential biases in RS41 temperature and pressure measurements increase the uncertainties of these comparisons?

Uncertainties arising from the treatment of the basic measurements through the water vapour parameterisation of Murphy and Koop 2005 and Hardy 98 are not relevant for the goal of this paper.

P5 L13: change “would allow for very little vertical resolution” to “yields measurements at much lower vertical resolution than during ascent”

Done (page 5, line 23).

P5 L21: why do you presume that the mean (gray) profile is completely “uncontaminated”? There must be some proof. Very low flight-to-flight variability in these “uncontaminated” profiles? Comparisons to satellite profiles in the region? I think the term “uncontaminated” is not warranted here unless you provide some sort of evidence.

All the water vapour measurements by the CFH in the 16/17 StratoClim dataset have been extensively analysed in previous publication, see Brunamonti et al. (2018, 2019). The measurements have not been compared to satellite data but to the ECMWF operational and reanalysis products. The CFH water vapour measurements in the stratosphere show very little flight-to-flight variability. However, they still show higher variability than the model products. They would also show higher variability than the satellite measurement. However, this is the nature and the purpose of balloon borne water vapour measurements. They allow for better vertical and horizontal resolution of water vapour features. Nevertheless, we agree that the use of the expression “uncontaminated” is abusive without some sort of evidence. So, we have reformulated it to “excluding contaminated profiles”. The change was applied throughout the manuscript.

P5 L29: Please briefly state why the COBALD must only be flown at night

The following explanation was added to the manuscript: ‘The COBALD can only be flown at night because daylight saturates the photodetector (Cirisan et al., 2014).’ (page 5 line 32 and 33).

P6 L11: Here and throughout the paper. Please restrict the labeling of Figure markers, lines and curves in the body text, e.g., “air temperature from RS41 (green)”, to Figure captions, otherwise you are simply repeating in the body text what is stated in the captions. When viewing the figures it is much easier for readers to consult the captions for this information than the body text.

Done where applicable.

P6 L13: Does the “freezing cycle at  $T_{\text{frost}} = -15\text{ }^{\circ}\text{C}$ ” include a “burn-off” of the existing condensate on the mirror followed by a re-growth of ice, or just a forced freezing of any liquid present on the mirror? If the former, why is the existing condensate first evaporated/sublimated?

In the existing literature the burn-off of the condensate on the mirror at about  $-15\text{ }^{\circ}\text{C}$  is not mentioned. Nevertheless, it is present as can be seen in Figure 2. We think that if the ice layer is formed just with a freezing cycle, there is a risk, in case there was already a mixture of liquid water and ice on the mirror, that the “final” ice layer is very inhomogeneous - with ice crystals of different sizes instead of a smooth ice layer. The burn-off at this temperature will eliminate all condensate. The subsequent fast cooling of the mirror allows for the formation of a more homogeneous ice layer.

Vömel et al. (2016) shows images of condensate layers at different conditions and temperatures. Although the controlling of a coarse ice layer with liquid patches at relatively warm temperatures ( $T = -26.8\text{ }^{\circ}\text{C}$ ) is stable, the controlling of a similarly looking condensate, although totally frozen, at lower temperatures is no longer stable.

We do not think that further discussion of the clearing and freezing cycles is relevant for the manuscript. The clearing and freezing cycles of the CFH are already discussed somewhere else in the paper (page 5 line 4 to 9).

P6 L18: How were “reasonable values” determined? Climatologies? Satellite profiles? Could high mixing ratios ( $> 10$  ppmv) actually be present in the LS due to overshooting convection? Jim Anderson and his group claim they measured  $> 12$  ppmv in the LS over the North American monsoon.

In this context, “reasonable values” mean values similar to those observed in the season average of the water vapour mixing ratio measured by the CFH excluding the contaminated profiles - the black line in Figure 2b.

P6 L21: Some readers may not know what “glaciation” means in this context. Please briefly explain.

We have rephrased the sentence: ‘The lower cloud has  $S_{\text{liq}} < 1$  and is sufficiently cold that the presence of liquid water is unlikely’ (page 6, line 32 and 33). Glaciation time is explained later (page 7, line 25).

P6 L32: only “icing”? How about liquid water depositing on the warmer-than-ambient skin of the balloon? The balloon fill gas typically cools down at a slower rate than the ambient air temperature and keeps the balloon skin at super-ambient temperatures.

As long as the balloon is colder than  $0\text{ }^{\circ}\text{C}$ , super cooled water will freeze on impact with the balloon skin. At temperatures warmer than  $0\text{ }^{\circ}\text{C}$ , any liquid water that is not absorbed by the balloon skin, will most likely run off the skin of the balloon or evaporate once the balloon is in a sub-saturated region.

P7 L2: Some readers may not know what the Wegener-Bergeron-Findeisen process is. Please briefly explain.

We added an explanation of why we use the Wegener-Bergeron-Findeisen process here: ‘Subsequently, we asked whether the balance between the different water phases described by the Wegener-Bergeron-Findeisen (Pruppacher and Klett, 1997; Korolev et al., 2017) process would provided enough time for the flights to encounter supercooled liquid droplets at these high altitudes and low temperatures’ (page 7, line 13 to 15). Any further explanation is not in the scope of this paper, but can be found in the references provided.

P7 L13: I find this section, “Modelling of mixed-phase clouds”, to be interesting, but not really an essential part of this paper about the contamination of FP measurements. See my general comment above.

Answered above.

P8 L18: again, “mirror extrusion” doesn’t make sense. The mirror is not extruded in manufacture nor an extrusion of any type. It is the mirror itself that extends into the flow of air.

We consider the mirror to be the surface parallel to the air flow, where the ice layer forms. “Mirror extrusion” refers to the “mirror part” which is perpendicular to the flow and allows



the mirror to stay halfway inside of the intake tube. We have replace “mirror extrusion” with “mirror holder” everywhere. The “mirror holder” defenition is provided in page 9 line 4.

P8 L20: “finite” is not needed here since angles cannot be “infinite”. “Non-zero” is better terminology.

Done (page 9, line 7).

P8 L22: “rotational motion” may need explanation here, since it is more of a 3- dimensional motion than a 2-D “pendulum” motion. The payload does not rotate around itself (tumble), but around the vertical axis like a helicopter rotor. A quick explanation will clear up any possible misconceptions.

Replaced by “circular movement” everywhere as suggested below.

P9 L14: change “rubber” to “latex”, since the balloon skin is synthetic, not natural

It is not relevant, so we removed it.

P9 L26” change “to stem form” to “stems from”

Done (page 10, line 16).

P9 L28: change “decomposed” to “separated”

Done (page 10, line 18).

P10 L4: I’m ok with the term “impingement angle”, but not the use of “impingement” as a verb in this situation. I think “impact”, which is both a noun and verb, is a better choice. “Droplets impacting the walls” or “Droplets that impacted the walls” is much clearer. Please change throughout the paper.

Thanks for the suggested clarification, which we implement.

P10 L20: I do not understand what you mean by “also for the circulation around the equilibrium point”. Are you addressing payload rotation (helicoptering) around the equilibrium point? Please clarify.

We agree with the referee. We rephrased the sentence (page 11, line 8).

P10 L28: change “after the ice sublimated” to “until the ice sublimates”

Done (page 11, line 16 and 17).

P11 L14: “extends for 34 cm” from what? Presumably the insulating container?

The intake tube is 34 cm long from intake to outlet. We have rephrased the sentence. (page 12, line 5).

P11 L15: more “extruding” and “extrusion” problems here. Change “extruding” to “that extends”, while the word “extrusion” can be omitted.

We rephrased the sentence (page 12, line 7 and 8).

P13 L21: replace the comma with “while”

Done (page 14, line 14).

P14 L11: remove the “-“ from in-homogeneously

Done (page 15, line 9).

P14 L26: it isn't clear what the phrase “air mass experienced by the mirror in real flight conditions” means here. Are you asserting that the entire flow of air through the instrument influences the frost point temperature, and not just the air flowing right next to the mirror? If so, I agree.

We appreciate the comment of the referee and have rephrased the paragraph: ‘We believe that the entire flow of air through the intake tube influences the frost point temperature, and not just the air flowing right next to the mirror.’ (page 15, line 24 to 26).

P16 L28: change to “during the traverse through the mixed-phase cloud”

Done (page 17, line 28).

P16 L31: change “water” to “ice” since liquids don't sublimate. Same for “condensate” in line 33

Done (page 17, line 31 and 33).

P17 L4: only solids sublimate, so the phrase “more water vapor sublimated” makes no sense. Similar problem P18 L24

Done everywhere sublimation was not associated with ice.

P17 L30: “more hit” is awkward. How about “hit most frequently”? And “during the mixed-phase cloud” is also awkward, so please change to “within the mixed-phase cloud”

Done (page 18, line 29).

P17 L33: remove “with some water vapor”

Done (page 18, line 32).

P18 L11: Why is the range “4-8 ppmv” expected? 8 ppmv seems excessive for the altitude limits of balloons. However, in the LS, 8 ppmv might be possible from overshooting convection, but that would be very infrequently sampled.

We thank the reviewer and change the “4-8 ppmv” to “2-6 ppmv”. (page 19 line 11)

P18 L14: change to “day-to-day”

Done (page 19, line 13).

P18 L15: change “have in average a dry bias” to “have, on average, a dry bias” and change to “flight-by-flight” (add hyphens)

Done (page 19, line 12 and 13).

P18 L17-19: “it was not clear whether RS41 had a dry bias or if CFH measured a too high humidity” sounds like a solid argument for NOT using the RS41 RH measurements to check if the CFH measurements were contaminated. Then you emphatically state that this is what you did. This is somewhat confusing and needs to be re-written with greater clarity.

We see the reviewer’s point. We clarified this by rewriting as follows: “Brunamonti et al. (2019) found the RS41 to have, on average, a dry bias in comparison with the CFH in the upper troposphere during StratoClim. However, in a flight-by-flight comparison, when the CFH was contaminated, it was not clear whether the RS41 had a dry bias or the CFH measured a too high humidity. As a conservative assumption, we assumed the RS41 water vapour measurement to be correct and we used it as reference for the analysis of the CFH contamination in the upper troposphere.” (page 19, lines 18 and 19)

P19 L10: “CFH under-estimated the water vapour measurement in relation to the RS41” is awkward. The instrument doesn’t “estimate” anything, it measures the frost point temperature. Please fix this sentence.

Fixed (page 20, line 10 to 11).

P19 L14-15: Combine these two sentences by including “1.45 mg” in the first sentence.

We have rephrased these sentences according to the Anonymous Referee # 1 suggestion: ‘To estimate an upper limit for the LWC in the mixed phase cloud, we compared the total water vapour measured by the CFH and the RS41 using Formula (8) in the interval between the top of the lower cloud and the cirrus cloud at the tropopause (from 13.5 to 17 km altitude). We concluded that the CFH measured at least 1.45 mg of water more than the RS41 in this interval.’ (page 20, line 14 to 16).

P19 L25: By “instrument payload” you are referring to the insulating container surrounding the CFH, correct? Something like a radiosonde on the other side of the container could not possibly contaminate the air flow into the CFH, correct?

Yes, it is more likely that the air flow into the CFH is contaminated by ice sublimating from the CFH box than by ice sublimating from the radiosonde, but just because the CFH box is closer to the opening of the intake tube than the radiosonde.

P19 L30: add “(2084 masl)” after Nainital. This explains the surface pressure of 800 hPa.

We appreciate the referee's diligence providing the altitude of Nainital. However, the launch location was at ARIES - Aryabhata Research Institute of Observational Sciences which stands at 1820 masl. We have added the altitude above sea level for ARIES but kept the location as Nainital for simplicity (page 20, line 30).

P20 L10: in this instance, is "circular movement" what was earlier referred to "rotational motion"? If so, I prefer "circular movement" throughout the manuscript because it's meaning is perfectly clear, unlike "rotational motion".

Changed everywhere as suggested by the referee, see above.

P20 L13: "in this region at this pressure level" seems redundant

We have removed this sentence (page 21, line 13).

P20 L22: I don't think "exclude" is justified here, but identifying the balloon as "a minor contributor to contamination" is.

Thanks, we have rephrased this sentence as suggested. (page 21, line 22 and 23).

P20 L33: omit "mixing ratio" since it is clear what 12 ppmv is.

Done (page 21, line33).

P21 L27: "As conclusion" is awkward. "In conclusion" is better.

Done (page 22, line 26).

P21 L21: change to: "We investigated the potential contamination of water vapor measurements ..."

Done (page 22, line 31).

P22 L2: I'm pretty sure you didn't encounter mixed-phase clouds, but the balloon and payload certainly did.

We rephrased the sentence (page 23, line 2).

P22 L3: Pardon my ignorance, but doesn't "mixed-phase" imply the presence of both liquid water and ice? Otherwise, what two phases are mixed in the cloud? So why is it even necessary to say that "liquid water was likely present in all of them"?

The referee is correct, "mixed-phase" imply the presence of both liquid water and ice. However, the observed  $S_{\text{liq}}$  within the clouds does not allow us to immediately infer the presence of liquid in these clouds. The modelling of the cloud suggests a scenario where the presence of liquid droplets is compatible with the observed  $S_{\text{liq}}$ . We have rephrased the motivation of Section 2.4 to convey this message (page 6, line 32 and 33 and page 7 lines 8 to 12). We will maintain the emphasis on the presence of liquid water in these mixed-phase clouds in the conclusion (page

23, page 2).

P22 L10: omit “already”

Done (page 23, line 9).

P22 L16: do you really mean “protecting” here? Or is “preserving” a better way to describe this?

We agree with the referee. Done (page 23, line 16).

P22 L22: “fast ascent balloon velocities” is awkward. I would remove “balloon”.

Done (page 23, line 22).

P22 L25: replace “a slow balloon ascent through the entire flight between 3 and 4 m/s” with “the ascent rate was slow (3-4 m/s) for the entire flight”

Done (page 23, line 24 and 25).

P22 L29: the contamination does not “affect the operation of the CFH”, it affects what is being measured.

We rephrased the sentence (page 23, line 28).

P22 L31: replace “found in these cases” with “below 20 hPa during these three flights.”

Done (page 23, line 30).

P22 L32: replace “the enhanced and contaminated water vapor values” with “the contamination”

We rephrased this sentence to refer to the contamination in the season average water vapour profile (page 23, line 31 and 32).

P23 L1: what is a “two balloon tandem”? “flying two balloons separated” is clearer.

Done (page 24, line 2).

P23 L4: you showed (above) that the contamination from the balloon skin was nearly negligible, but now are concerned that a payload spending more time in the balloon wake would be more prone to contamination. Is more of something negligible necessarily a problem?

Above, we showed that the contamination is negligible, if the payload oscillates outside of a certain range directly below the balloon, i.e. when the radius of the circular movement is  $> 5$  m. If the radius of the circular movement is  $< 5$  m, the risk of contamination by ice sublimating from the balloon skin becomes significant above the 50 hPa level, see Figure 15.

P23 L10: “atmospheric air” is redundant. Omit “atmospheric”

Done (page 24, line 10).

P23 L19: Just for your information, the older Vaisala RS92 did this with its dual RH sensors, deicing one while the other made measurements, then switching.

Noted.

P23 L23: change to “We made many assumptions”

Done (page 24, line 23).

## References

- Brunamonti, S., Jorge, T., Oelsner, P., Hanumanthu, S., Singh, B. B., Kumar, K. R., Sonbawne, S., Meier, S., Singh, D., Wienhold, F. G., Luo, B. P., Böttcher, M., Poltera, Y., Jauhiainen, H., Kayastha, R., Dirksen, R., Naja, M., Rex, M., Fadnavis, S., and Peter, T.: Balloon-borne measurements of temperature, water vapor, ozone and aerosol backscatter at the southern slopes of the Himalayas during StratoClim 2016-2017, *Atmospheric Chemistry and Physics*, 2018, 1–38, <https://doi.org/10.5194/acp-2018-222>, 2018.
- Brunamonti, S., Füzér, L., Jorge, T., Poltera, Y., Oelsner, P., Meier, S., Dirksen, R., Naja, M., Fadnavis, S., Karmacharya, J., Wienhold, F. G., Luo, B. P., Wernli, H., and Peter, T.: Water Vapor in the Asian Summer Monsoon Anticyclone: Comparison of Balloon-Borne Measurements and ECMWF Data, *Journal of Geophysical Research: Atmospheres*, <https://doi.org/10.1029/2018jd030000>, 2019.
- Cirisan, A., Luo, B. P., Engel, I., Wienhold, F. G., Sprenger, M., Krieger, U. K., Weers, U., Romanens, G., Levrat, G., Jeannet, P., Ruffieux, D., Philipona, R., Calpini, B., Spichtinger, P., and Peter, T.: Balloon-borne match measurements of midlatitude cirrus clouds, *Atmospheric Chemistry and Physics*, 14, 7341–7365, <https://doi.org/10.5194/acp-14-7341-2014>, 2014.
- Korolev, A., McFarquhar, G., Field, P. R., Franklin, C., Lawson, P., Wang, Z., Williams, E., Abel, S. J., Axisa, D., Borrmann, S., Crosier, J., Fugal, J., Krämer, M., Lohmann, U., Schlenczek, O., Schnaiter, M., and Wendisch, M.: Mixed-Phase Clouds: Progress and Challenges, *Meteorological Monographs*, 58, 5.1–5.50, <https://doi.org/10.1175/amsmonographs-d-17-0001.1>, 2017.
- Pruppacher, H. R. and Klett, J. D.: *Microphysics of Clouds and Precipitation.*, Kluwer Academic Publishers, 1997.
- Vömel, H., Naebert, T., Dirksen, R., and Sommer, M.: An update on the uncertainties of water vapor measurements using cryogenic frost point hygrometers, *Atmospheric Measurement Techniques*, 9, 3755–3768, <https://doi.org/10.5194/amt-9-3755-2016>, 2016.
